# Supplementary material
Source: PubMed Central journal article supplement (PMC4718832)
Supplement: NIHMS747325-supplement.pdf [file NIHMS747325-supplement.pdf]

## Supplemental Materials

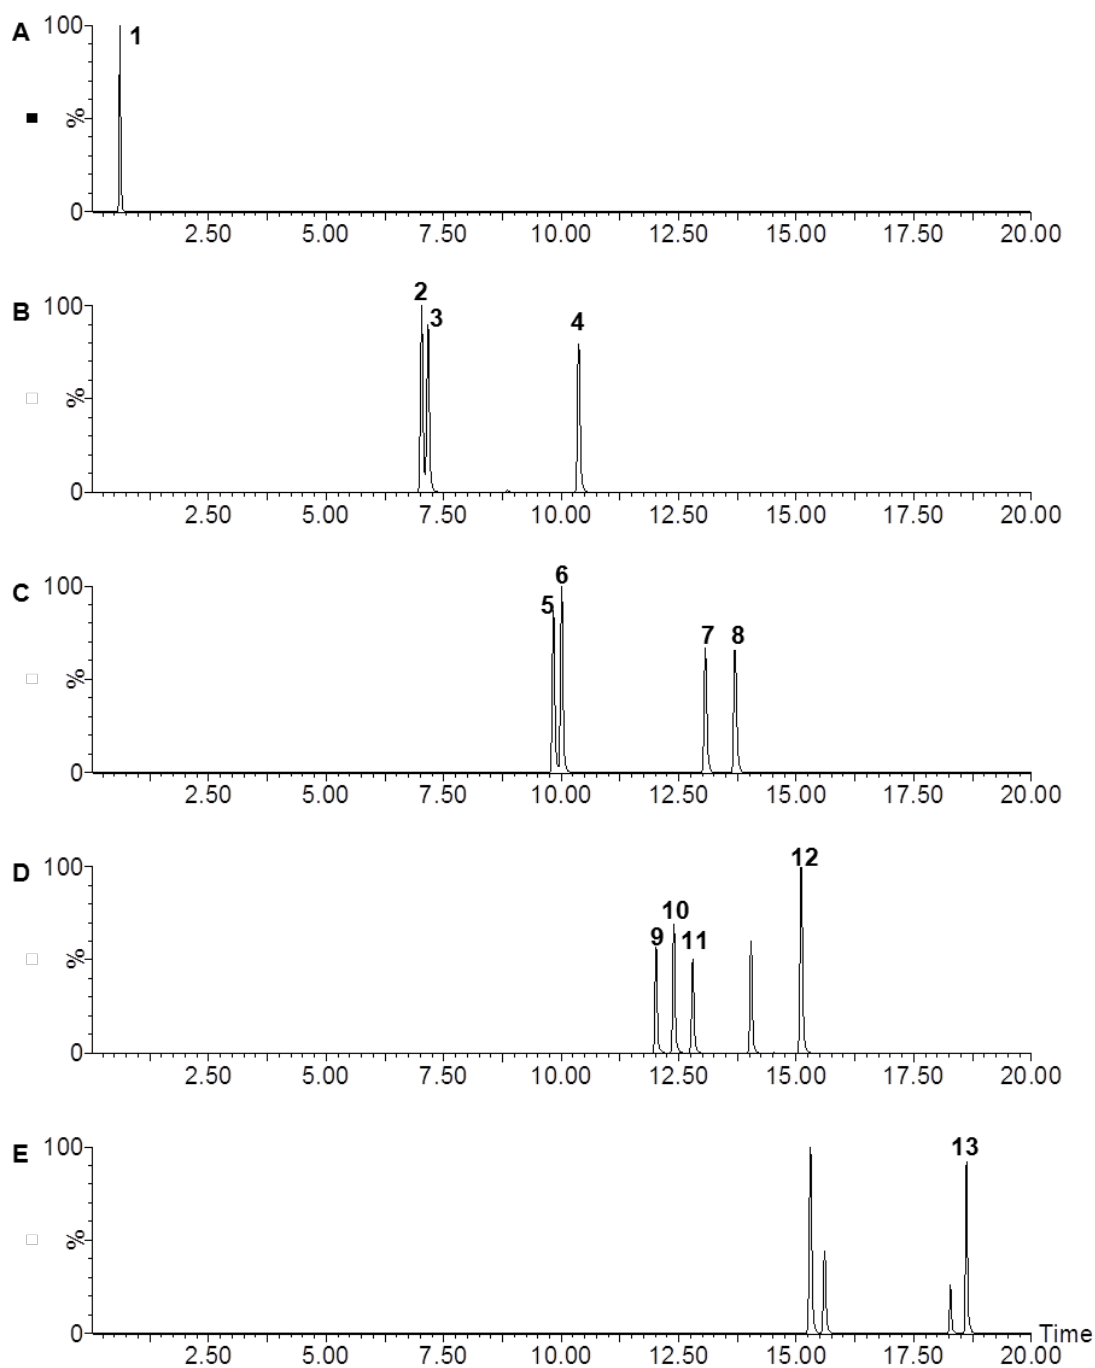

**Supplemental Figure 1.** Representative chromatograms of the bile acid standards. (A) Peak 1: Taurine. (B) Peak 2: T- $\alpha$ -MCA; Peak 3: T- $\beta$ -MCA; Peak 4: TCA. (C) Peak 5: T-UDCA; Peak 6: T-HDCA; Peak 7: T-CDCA; Peak 8: T-DCA. (D) Peak 9:  $\omega$ -MCA; Peak 10:  $\alpha$ -MCA; Peak 11:  $\beta$ -MCA; Peak 12: CA. (E) Peak 13: DCA.

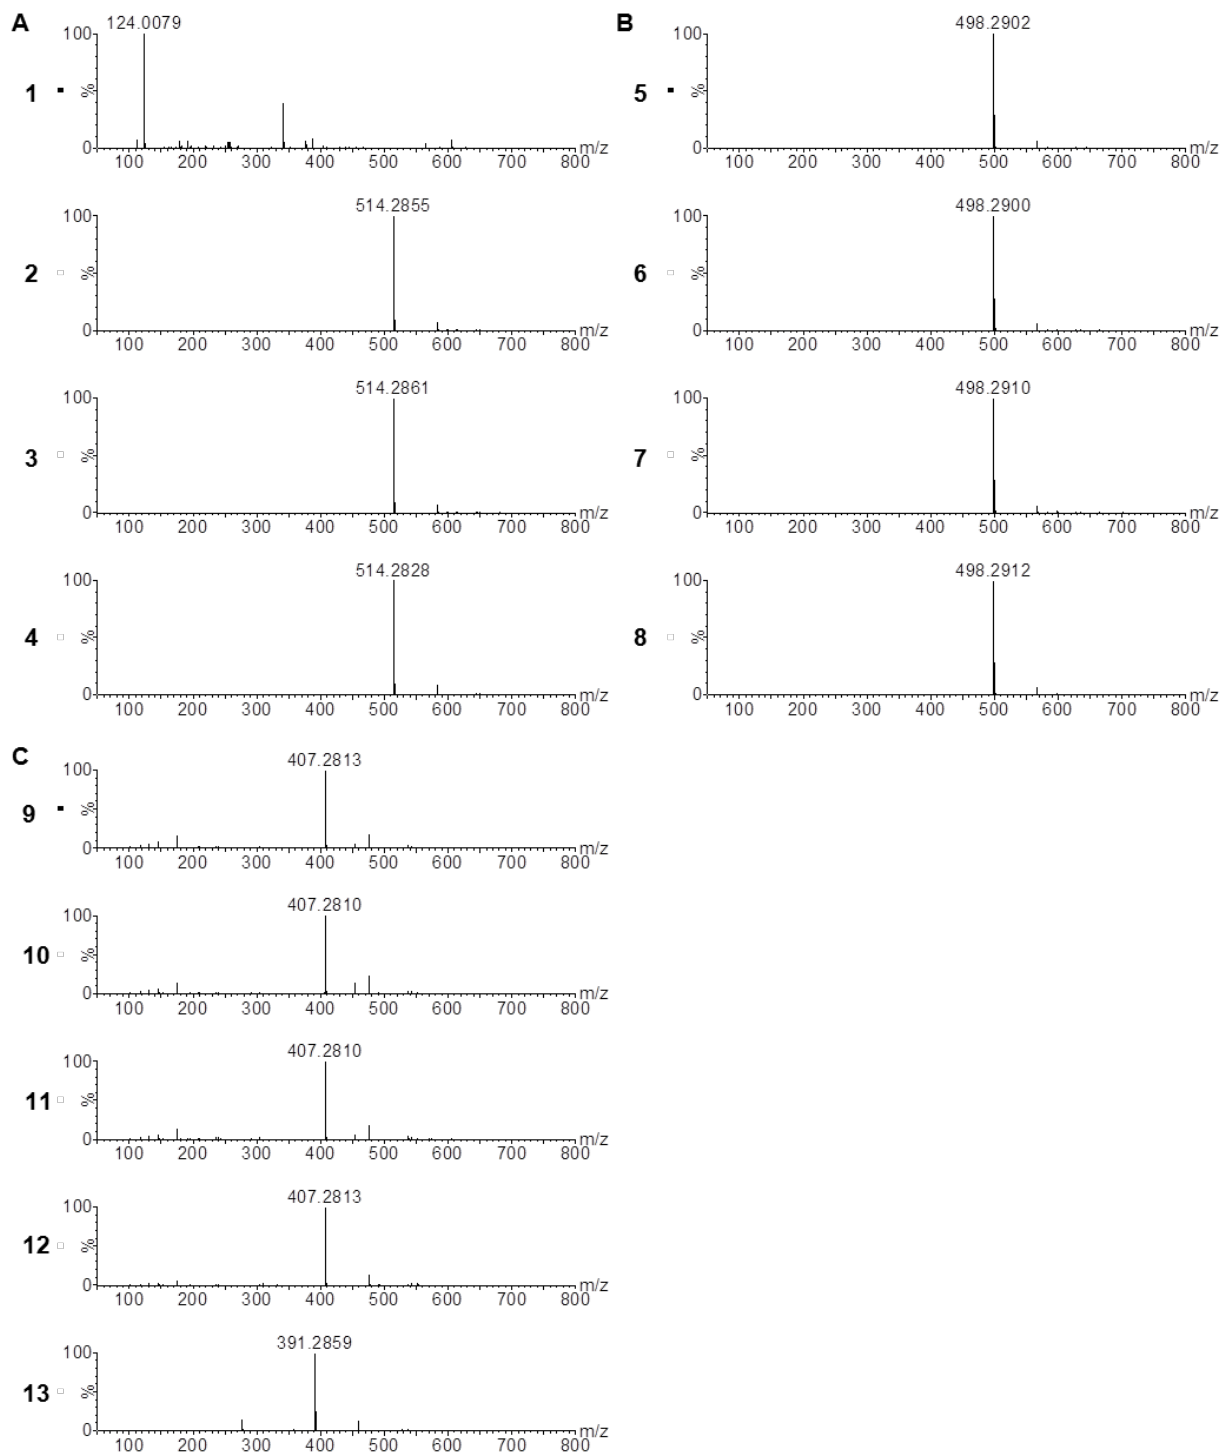

**Supplemental Figure 2.** Representative mass spectra of the bile acid standards. (A) 1: Taurine; 2: T- $\alpha$ -MCA; 3: T- $\beta$ -MCA; 4: TCA. (B) 5: T-UDCA; 6: T-HDCA; 7: T-CDCA; 8: T-DCA. (C) 9:  $\omega$ -MCA; 10:  $\alpha$ -MCA; 11:  $\beta$ -MCA; 12: CA; 13: DCA.

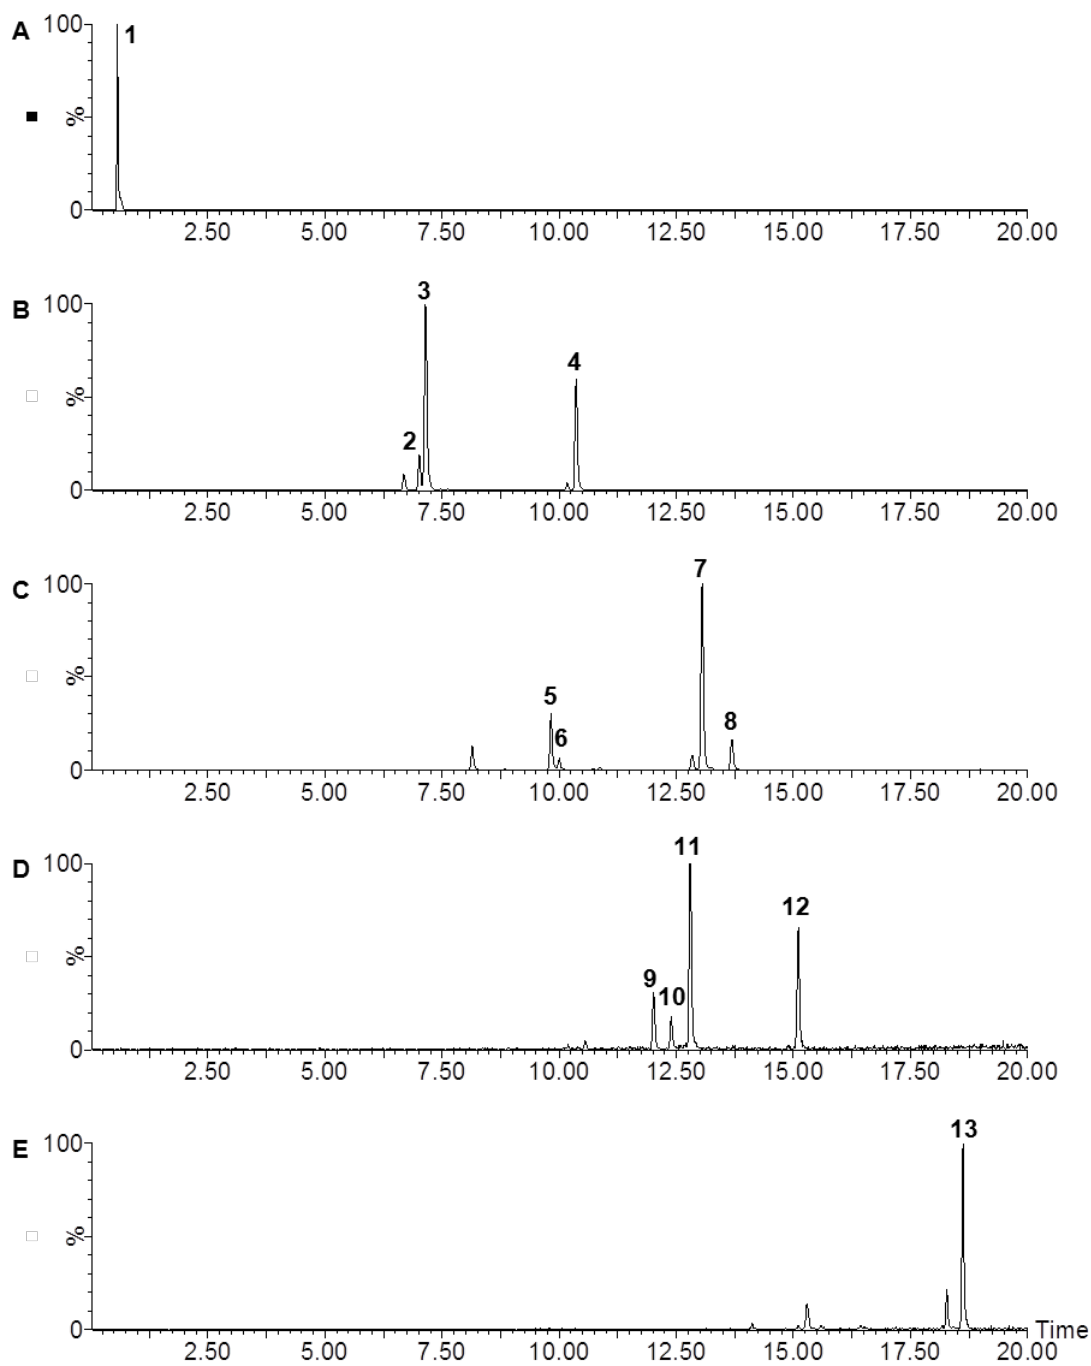

**Supplemental Figure 3.** Representative chromatograms of bile acids. (A) Peak 1: Taurine. (B) Peak 2: T- $\alpha$ -MCA; Peak 3: T- $\beta$ -MCA; Peak 4: TCA. (C) Peak 5: T-UDCA; Peak 6: T-HDCA; Peak 7: T-CDCA; Peak 8: T-DCA. (D) Peak 9:  $\omega$ -MCA; Peak 10:  $\alpha$ -MCA; Peak 11:  $\beta$ -MCA; Peak 12: CA. (E) Peak 13: DCA.

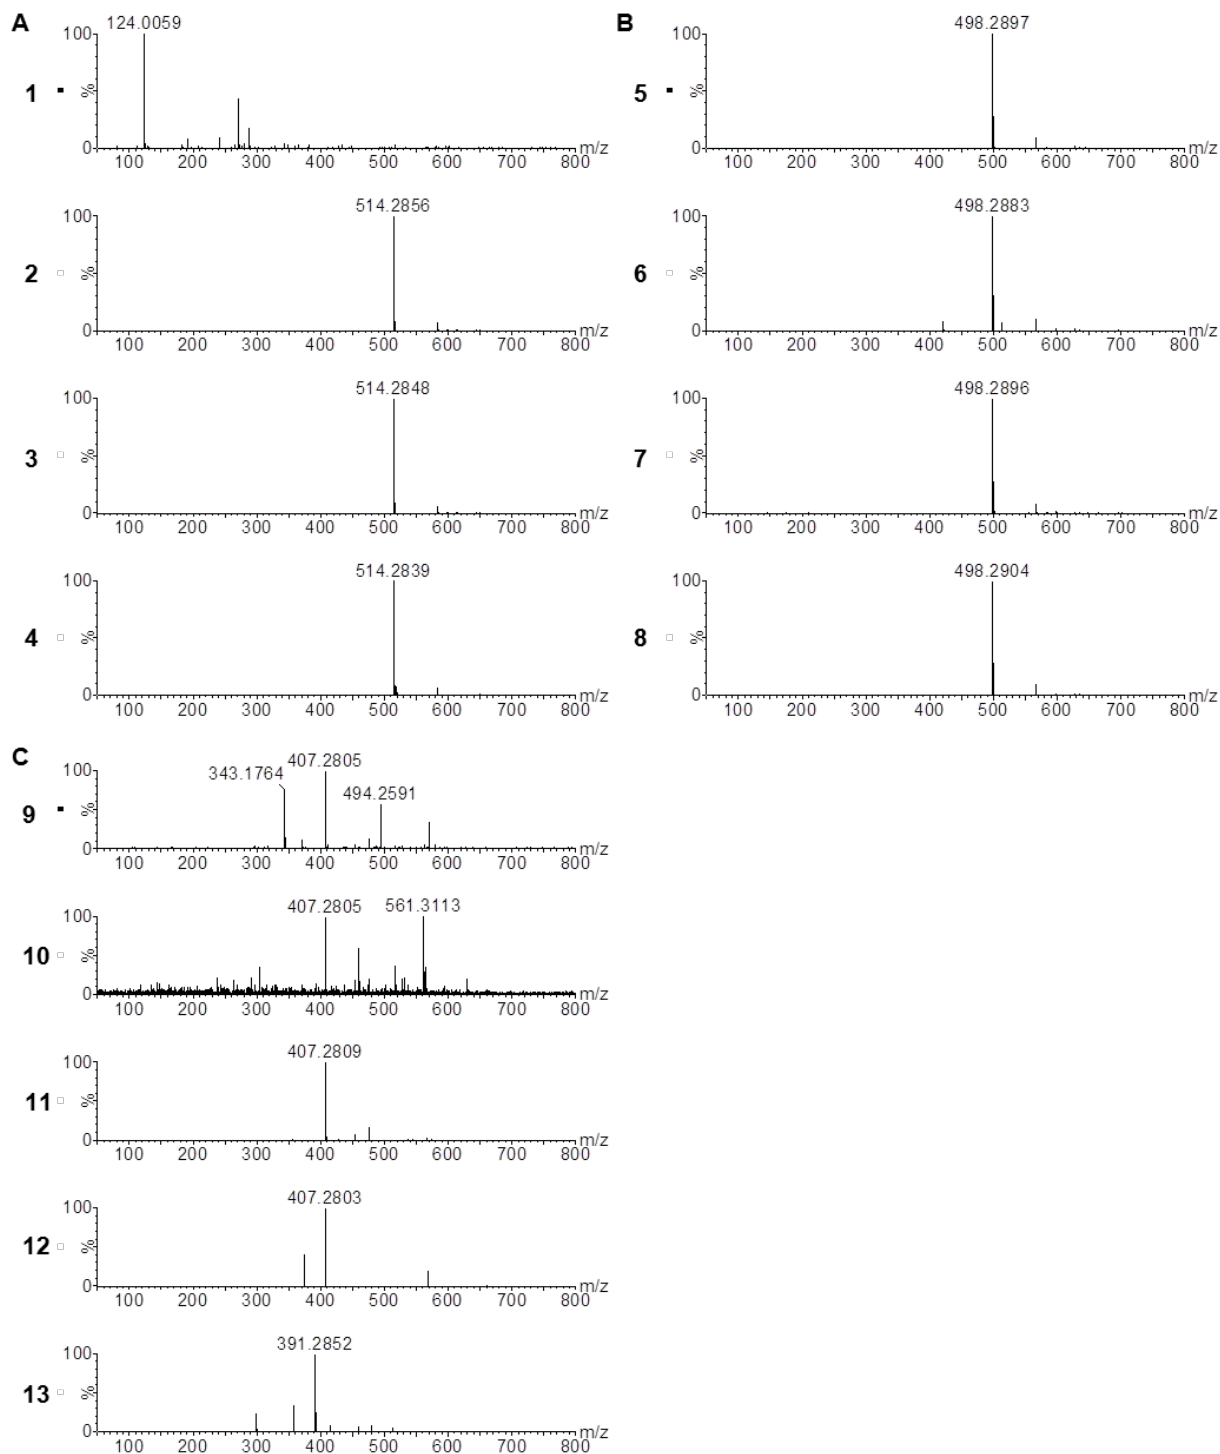

**Supplemental Figure 4.** Representative mass spectra of the bile acids. (A) 1: Taurine; 2: T- $\alpha$ -MCA; 3: T- $\beta$ -MCA; 4: TCA. (B) 5: T-UDCA; 6: T-HDCA; 7: T-CDCA; 8: T-DCA. (C) 9:  $\omega$ -MCA; 10:  $\alpha$ -MCA; 11:  $\beta$ -MCA; 12: CA; 13: DCA.
